# Supplementary material for: A closer look at cannabimimetic terpenes, polyphenols, and flavonoids: a promising road forward
Source: PubMed Central journal article supplement — Neural Regen Res. 2020 Dec 12;16(7):1433–5. doi: 10.4103/1673-5374.301011 (PMC8284286; doi:10.4103/1673-5374.301011), 2020-12-12
Supplement: NRR-16-1433_Suppl1.pdf [file NRR-16-1433_Suppl1.pdf]

## OPEN PEER REVIEW REPORT 1

**Name of journal:** Neural Regeneration Research

**Manuscript NO:** NRR-D-20-00486

**Title:** A closer look at cannabimimetic terpenes, polyphenols, and flavonoids: a promising road forward!

**Reviewer's Name:** Evguenia P. Bekman

**Reviewer's country:** Portugal

### COMMENTS TO AUTHORS

The manuscript is apparently focused on the cannabimimetic terpenes. However, the section dedicated to cannabimimetic substances is smaller than that dedicated to cannabinoids and brings no novelty to the field, considering two very recent reviews in this field (Kumar et al 2019 and Gonçalves et al 2020). Rather than extensive citation of these two reviews, authors should clearly delineate which topics were already discussed in the literature, and which novel topics of discussion they want to bring to the reader's attention.

The authors touch several subjects slightly leaving the reader unfamiliar with the subject in a dark concerning, for example, cannabinoid mechanism of action. A short mention of inhibition of synaptic transmission would help to understand the discussed clinical applications of these substances.

My feeling is that authors gave away too much detail for the sake of concise review. The overall result is that no clear idea is conveyed to the reader, because nothing is explained, and different concepts are mixed in the same paragraph. For example, medical applications of cannabinoids and the use of dronabinol for treatment of cannabis use disorders are discussed all together.

My suggestions are to restructure the manuscript, dedicating each paragraph to a specific theme, and provide essential details, such as the mechanism of action mentioned above, both for endo- and phytocannabinoids. I would also recommend removing topics discussed elsewhere and focus more on the new data, that in this way can be discussed with more detail thus providing a clearer idea to the reader.
