# Supplementary material for: A closer look at cannabimimetic terpenes, polyphenols, and flavonoids: a promising road forward
Source: PubMed Central journal article supplement — Neural Regen Res. 2020 Dec 12;16(7):1433–5. doi: 10.4103/1673-5374.301011 (PMC8284286; doi:10.4103/1673-5374.301011), 2020-12-12
Supplement: NRR-16-1433_Suppl2.pdf [file NRR-16-1433_Suppl2.pdf]

**OPEN PEER REVIEW REPORT 2**

**Name of journal:** Neural Regeneration Research

**Manuscript NO:** NRR-D-20-00486

**Title:** A closer look at cannabimimetic terpenes, polyphenols, and flavonoids: a promising road forward!

**Reviewer's Name:** Raffaele Capasso

**Reviewer's country:** Italy

**COMMENTS TO AUTHORS**

Strengths - innovation, current, novelty, medical and clinical perspectives.

Weaknesses - reduced size and number of references.

The perspective article by Cavalli and Dutra highlights some pharmacological effects of phytocannabinoids as well as non-cannabinoids components of Cannabis, including terpenes, polyphenols, and flavonoids. Furthermore, they made a broad search on several cannabimimetic ligands from different plants, which may act through some components of the endocannabinoid system. The authors provide convincing perspectives that 1) cannabinoid receptors are very promising targets and will probably be continuously prioritized in further studies concerning the mechanism of action of terpenoid, polyphenol, and flavonoid compounds, 2) a new scientific-guided road might be paved to obtain commercial products oriented to better satisfy the persisting needs on the treatment of several diseases. Overall, this is a very interesting manuscript, adding substantial perspective to the existing literature on the role of the new phytocannabinoid ligands, even beyond the Cannabis sativa plant, regarding its therapeutic uses. No suggestions for improvement, as the manuscript reads clearly and their discussion are in line of studies related to cannabinoid research.
